# Supplementary material for: Pore engineering of biomolecule-based metal–organic framework nanocarriers for improving loading and release of paclitaxel
Source: Royal Society of Chemistry journal article supplement (doi:10.1039/d2nj00416j), 2022-01-01
Supplement: d2nj00416j1.pdf [file d2nj00416j1.pdf]

Supporting information

**Pore Engineering of Biomolecule-Based Metal–Organic Framework  
Nanocarriers for Improving Loading and Release of Paclitaxel**

Linh Ho Thuy Nguyen,<sup>1,2,3,†</sup> Y Thi Dang,<sup>1,2,†</sup> Trang Thi Thu Nguyen,<sup>1,2</sup> Bao Quang Gia  
Le<sup>1,2,4</sup>, Ngoc Xuan Dat Mai,<sup>1,2</sup> Ha Van Nguyen,<sup>2,5</sup> Tri Minh Le,<sup>2,5</sup> Thang Bach Phan,<sup>1,2</sup> Tan  
Le Hoang Doan,<sup>1,2,\*</sup>

<sup>1</sup>*Center for Innovative Materials and Architectures (INOMAR), Ho Chi Minh City, Viet Nam*

<sup>2</sup>*Viet Nam National University, Ho Chi Minh City, Viet Nam*

<sup>3</sup>*Faculty of Chemistry, University of Science, Ho Chi Minh City, Viet Nam*

<sup>4</sup>*Department of Chemistry, University of Massachusetts Amherst, Amherst, Massachusetts,  
United States*

<sup>5</sup>*School of Medicine, Ho Chi Minh, Vietnam*

<sup>†</sup>These authors contributed equally to this work.

\*Email: [dlhtan@inomar.edu.vn](mailto:dlhtan@inomar.edu.vn)

## Section S1: Materials and General Methods

### Materials

Zinc acetate dihydrate ( $\text{Zn}(\text{OAc})_2 \cdot 2\text{H}_2\text{O}$ ,  $\geq 98\%$ ), polyvinylpyrrolidone (PVP, average mol wt 40000) were obtained from Sigma-Aldrich company. 4-nitrobenzoic acid (99%), adenine (99%), 4,4'-biphenyldicarboxylic acid ( $\text{H}_2\text{BPDC}$ , 98%), paclitaxel (PTX, 99%) were obtained from Acros Chemical company. NaOH ( $\geq 97\%$ ), d-glucose anhydrous, hydrochloric acid (HCl, 37%), *N,N*-dimethylformamide (DMF,  $\geq 99.8\%$ ), ethanol (99%), methanol (99%) were supplied by Fisher. All the chemicals were used in the experiments without further purification. Organic linker, azobenzene-4,4'-dicarboxylic acid ( $\text{H}_2\text{azo-BDC}$ ), was synthesized following the reported procedure.<sup>1</sup>

### General methods

Powder X-ray diffraction (PXRD) patterns were recorded using a Bruker D8 Advance with a Cu  $K\alpha$  radiation ( $\lambda = 1.54178 \text{ \AA}$ ) source. The synthesized material was examined by Fourier transform infrared (FT-IR) spectra in the range of 4000–400  $\text{cm}^{-1}$  on a Bruker Vertex 70 system. Nitrogen adsorption isotherms at 77 K were measured on a Quantachrome Autosorb iQ2. The microscope images were obtained on Olympus BX53 and Nikon SMZ1000. Field Emission Scanning Electron Microscopy analysis (FE-SEM) was conducted on SU8010, Hitachi, Japan. The residual content of PTX was analyzed by high-performance liquid chromatography (HPLC), equipped with a UV detector. HPLC analyses were recorded on Agilent Technologies 1200 Series with ZORBAX SB-C18 (Agilent, 5  $\mu\text{m}$ , 4.6  $\times$  250 mm) column. The mobile phase was water: acetonitrile (50:50 v/v). The separation was carried out at 30 °C. The detection wavelength was 227 nm, and a flow rate of 1.0  $\text{mL min}^{-1}$  was employed. A sample volume of 20  $\mu\text{L}$  was injected.

## Section 2. Synthesis of b-MOFs

b-Zn-BPDC was solvothermal synthesized through a solvothermal reaction containing zinc acetate dihydrate (54.88 mg, 0.25 mmol), adenine (16.89 mg, 0.125 mmol), H<sub>2</sub>BPDC (60.56 mg, 0.25 mmol) respectively, in 4.5 mL *N,N*-dimethylformamide (DMF) with polyvinylpyrrolidone (PVP, average mol wt 40000) added as a modulator. We studied the effect of the molar ratio of PVP on b-Zn-BPDC crystal formation. The mixture was then sonicated for 20 minutes with 1.8 mL methanol and 0.45 mL DI water. The suspension was heated at 85 °C for 24 h. Powder X-ray diffraction (PXRD) measurements were used to monitor the crystallinity of samples.

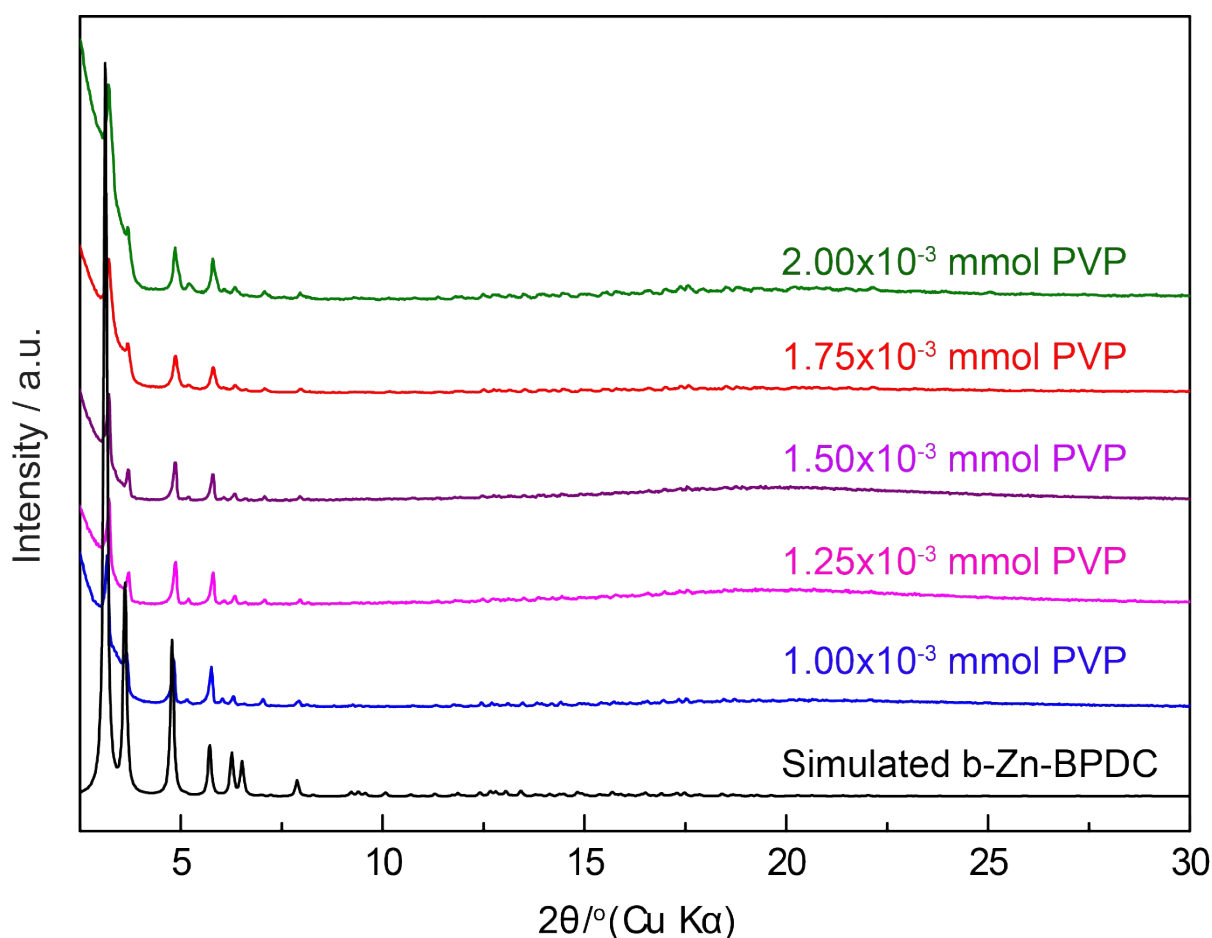

**Figure S1.** PXRD patterns of Zn-BPDC samples with the effect of the amount of PVP

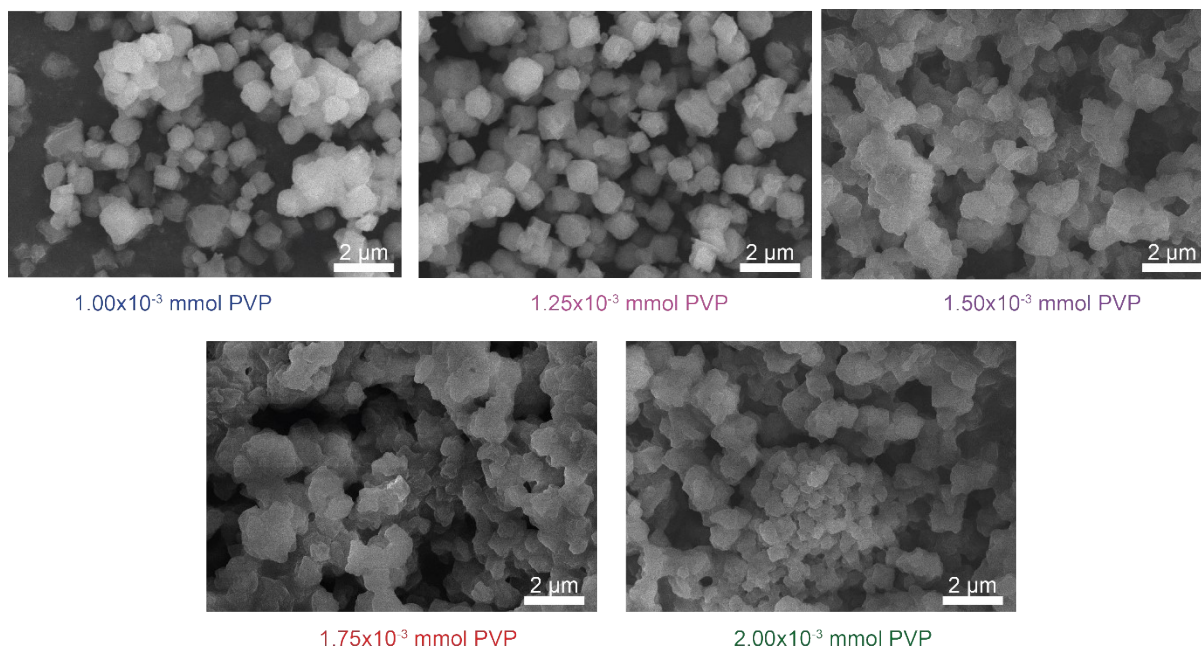

**Figure S2.** SEM images of b-Zn-BPDC nanoparticles at PVP screening.

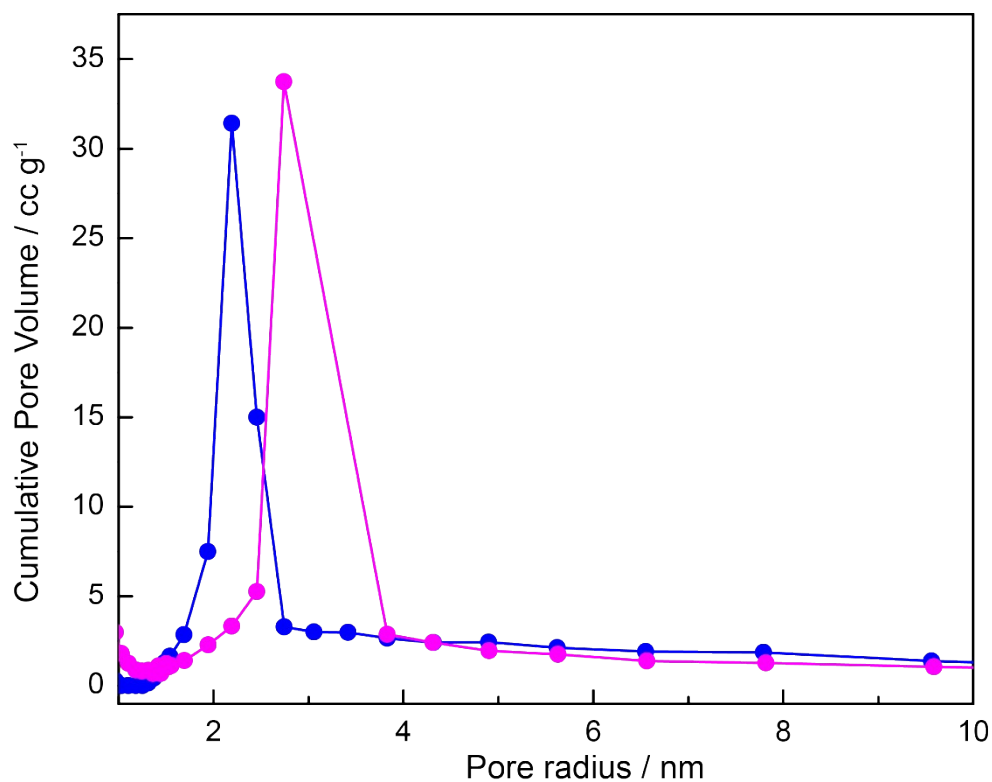

**Figure S3.** Pore size distribution of nano b-Zn-BPDC (blue), and nano b-Zn-azoBDC (magenta) from the Barrett-Joyner-Halenda (BJH) desorption isotherm analysis.

### Section 3. Dynamic light scattering (DLS) measurements

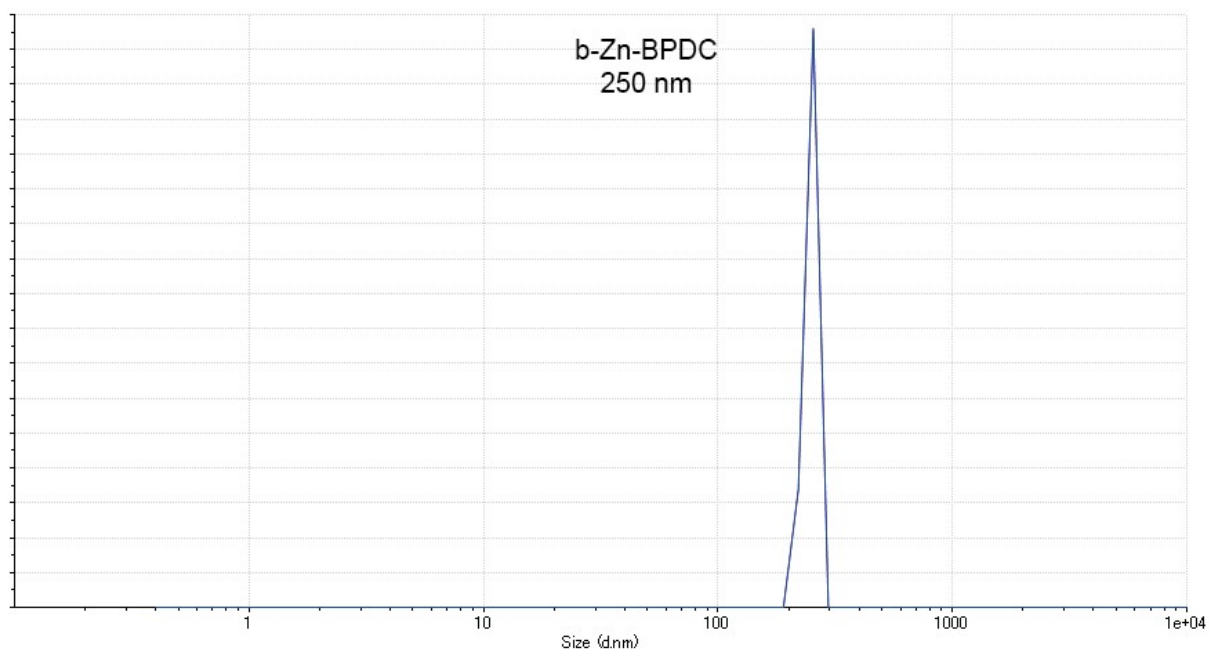

**Figure S4.** DLS of b-Zn-BPDC was analyzed by Zetasizer  $\mu$ V Malvern apparatus.

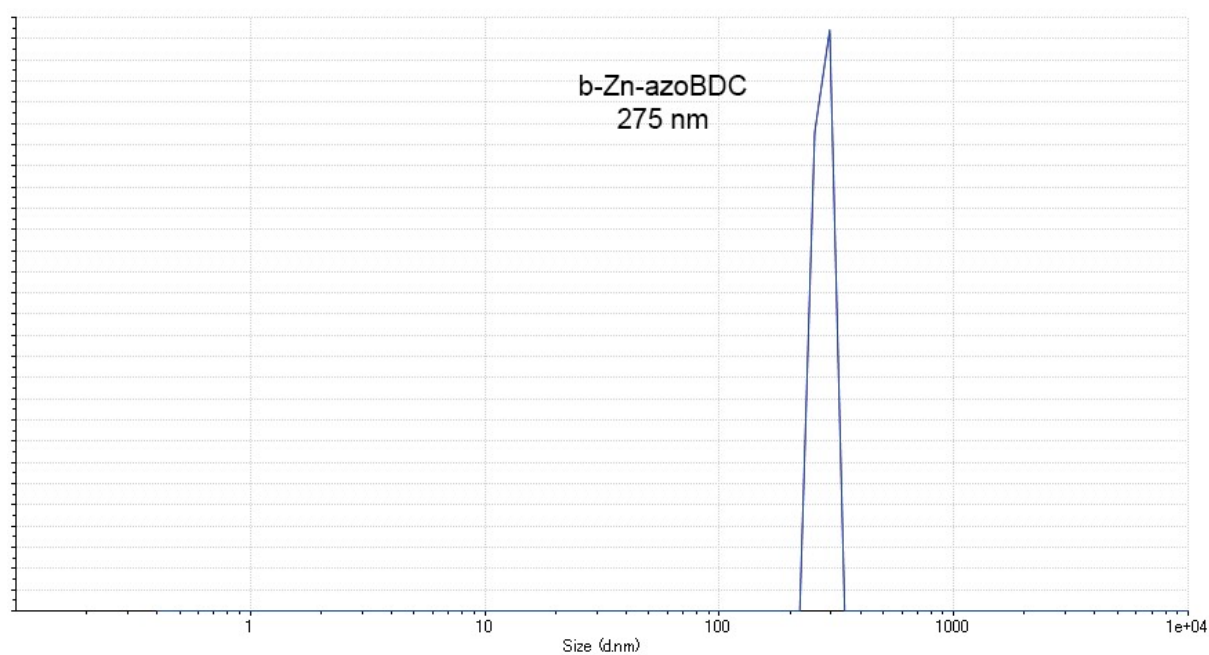

**Figure S5.** DLS of b-Zn-azoBDC was analyzed by Zetasizer  $\mu$ V Malvern apparatus.

1. Hoang, L. T. M.; Ngo, L. H.; Nguyen, H. L.; Nguyen, H. T. H.; Nguyen, C. K.; Nguyen, B. T.; Ton, Q. T.; Nguyen, H. K. D.; Cordova, K. E.; Truong, T., An azobenzene-containing metal–organic framework as an efficient heterogeneous catalyst for direct amidation of benzoic acids: synthesis of bioactive compounds. *Chemical Communications* **2015**, *51* (96), 17132-17135.
